# Supplementary material
Source: HighWire-hosted journal article supplement (https://jnm.snmjournals.org/highwire/filestream/94457/field_highwire_adjunct_files/0/121020_Supplemental_Data.pdf)
Supplement: 121020_Supplemental_Data.pdf [file 121020_Supplemental_Data.pdf]

Supplemental Table 1. Linear regression of  $V_T$  and age of HABs and MABs.

|             | HAB              |                  |           | MAB              |                  |           |
|-------------|------------------|------------------|-----------|------------------|------------------|-----------|
|             | Slope $\pm$ s.e. | y_int $\pm$ s.e. | Pearson r | Slope $\pm$ s.e. | y_int $\pm$ s.e. | Pearson r |
| Brain Stem  | 0.10 $\pm$ 0.04* | 0.04 $\pm$ 2.10  | 0.68*     | 0.05 $\pm$ 0.02* | 0.71 $\pm$ 0.84  | 0.78*     |
| Thalamus    | 0.09 $\pm$ 0.04* | 0.17 $\pm$ 1.93  | 0.67*     | 0.04 $\pm$ 0.02  | 0.99 $\pm$ 1.25  | 0.57      |
| Hippocampus | 0.10 $\pm$ 0.04* | 0.46 $\pm$ 1.84  | 0.73*     | 0.05 $\pm$ 0.02* | 0.27 $\pm$ 1.08  | 0.74*     |
| Cortical    | 0.09 $\pm$ 0.04* | 0.18 $\pm$ 1.80  | 0.67*     | 0.04 $\pm$ 0.02  | 1.03 $\pm$ 1.04  | 0.61      |
| Cerebellum  | 0.10 $\pm$ 0.04* | 0.35 $\pm$ 1.92  | 0.70*     | 0.05 $\pm$ 0.01* | 0.34 $\pm$ 0.74  | 0.81*     |
| Caudate     | 0.06 $\pm$ 0.03  | 0.75 $\pm$ 1.60  | 0.55      | 0.02 $\pm$ 0.02  | 1.13 $\pm$ 1.25  | 0.37      |

\*P<0.05

Supplemental Table 2. Correction for age effect in  $SUV_{90-120}$ ,  $V_T$  and  $V_T/f_p$  using ANCOVA.

| Estimate       | ROI      | HAB    |       |                |                 | MAB   |      |                |                 | LAB   |       |                |                 |
|----------------|----------|--------|-------|----------------|-----------------|-------|------|----------------|-----------------|-------|-------|----------------|-----------------|
|                |          | mean   | s.e.  | adjusted mean* | adjusted s.e. * | mean  | s.e. | adjusted mean* | adjusted s.e. * | mean  | s.e.  | adjusted mean* | adjusted s.e. * |
| $SUV_{90-120}$ | Cortical | 0.55   | 0.06  | 0.56           | 0.04            | 0.50  | 0.01 | 0.49           | 0.05            | 0.45  | 0.03  | 0.46           | 0.08            |
|                | Thalamus | 0.61   | 0.06  | 0.62           | 0.04            | 0.52  | 0.02 | 0.51           | 0.05            | 0.47  | 0.00  | 0.48           | 0.08            |
| $V_T$          | Cortical | 4.40   | 0.51  | 4.49           | 0.32            | 2.88  | 0.21 | 2.73           | 0.36            | 2.49  | 0.57  | 2.60           | 0.67            |
|                | Thalamus | 4.71   | 0.55  | 4.81           | 0.34            | 2.95  | 0.20 | 2.79           | 0.38            | 2.65  | 0.49  | 2.76           | 0.71            |
| $V_T/f_p$      | Cortical | 93.31  | 12.51 | 95.18          | 8.33            | 48.17 | 4.05 | 38.37          | 12.01           | 44.38 | 16.83 | 50.59          | 16.75           |
|                | Thalamus | 100.78 | 14.56 | 102.78         | 10.05           | 50.14 | 4.23 | 39.97          | 14.49           | 46.82 | 15.95 | 53.47          | 20.22           |

\*Adjusted mean and s.e. estimated at age 50.
